# Supplementary material
Source: publisher site journal article supplement (doi:10.18632/aging.206404)
Supplement: Supplementary file 1 [file pdf.pdf]

## Correction

## Correction for: miR-21 upregulation exacerbates pressure overload-induced cardiac hypertrophy in aged hearts

Wei-Ting Chang<sup>1,2,3</sup>, Jih-Yuan Shih<sup>2,4</sup>, Yu-Wen Lin<sup>1</sup>, Tzu-Ling Huang<sup>1</sup>, Zhih-Cherng Chen<sup>1</sup>, Chi-Long Chen<sup>5,6</sup>, Jan-Show Chu<sup>5,6</sup>, Ping Yen Liu<sup>1,7</sup>

<sup>1</sup>Institute of Clinical Medicine, College of Medicine, National Cheng Kung University, Tainan, Taiwan

<sup>2</sup>Department of Internal Medicine, Division of Cardiology, Chi-Mei Medical Center, Tainan, Taiwan

<sup>3</sup>Department of Biotechnology, Southern Taiwan University of Science and Technology, Tainan, Taiwan

<sup>4</sup>Department of Health and Nutrition, Chia Nan University of Pharmacy and Science, Tainan, Taiwan

<sup>5</sup>Department of Pathology, College of Medicine, School of Medicine, Taipei Medical University, Taipei, Taiwan

<sup>6</sup>Department of Pathology, Taipei Medical University Hospital, Taipei, Taiwan

<sup>7</sup>Department of Internal Medicine, Division of Cardiology, National Cheng Kung University Hospital, College of Medicine, National Cheng Kung University, Tainan, Taiwan

**Correspondence to:** Ping Yen Liu; **email:** [larry@mail.ncku.edu.tw](mailto:larry@mail.ncku.edu.tw)

**Keywords:** miR-21, aging, cardiac hypertrophy, hypertension, pressure overload

**Original article:** [Aging \(Albany NY\) 2022; 14:5925–5945](#)

PMID: [35907209](#)

PMCID: [PMC9365557](#)

doi: [10.18632/aging.204194](#)

**This article has been corrected:** The authors have identified an unintentional error in Figure 5B affecting the baseline systolic blood pressure (SBP) values in the aging group. Specifically, Day 0 values from the young cohort were mistakenly assigned to the aged group panel during data plotting. The corresponding author, Dr. Wei-Ting Chang, has confirmed that all raw measurements were generated directly from the acquisition system and remain intact, and submitted it to the journal. After re-exporting the original machine-generated data and reconstructing the figure, the corrected panel now accurately reflects the underlying data. This correction does not affect the statistical analyses, results, or conclusions of the study. The authors have expressed their sincere apologies for this oversight.

The corrected Figure 5 is presented below.

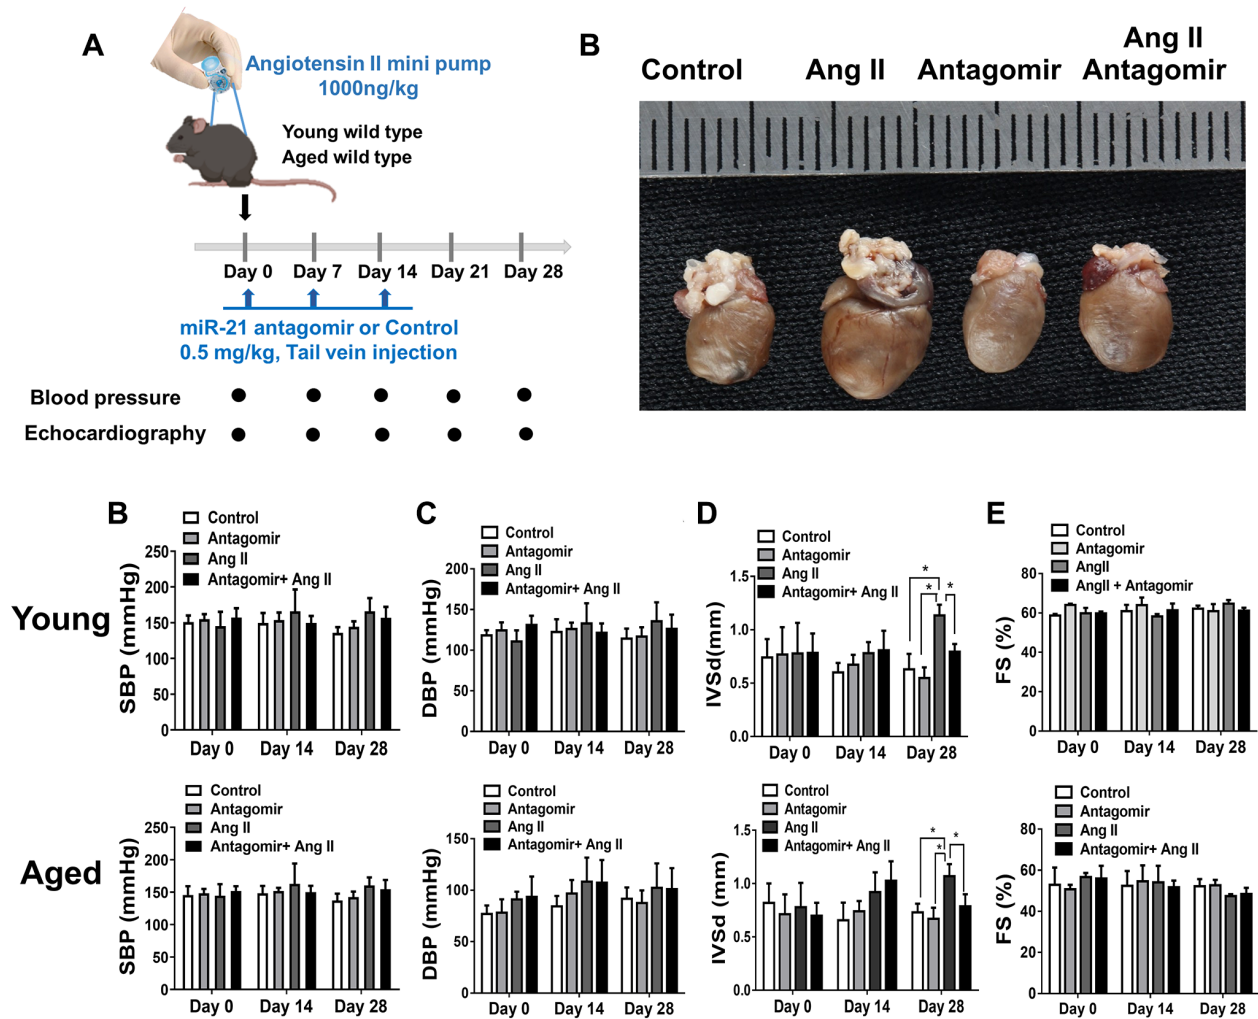

**Figure 5. The treatment of miR-21 antagonist mitigated angiotensin II (Ang II)-induced cardiac hypertrophy, especially in the aged mice.** (A) The study design investigating the effects of miR-21 antagonist in young (12 week-old) and aged mice (50 week-old) of Ang II-induced pressure overload. The sequential changes of (B) systolic, (C) diastolic blood pressures, echocardiography derived (D) intraventricular septal thickness at diastole (IVSd), and (E) fractional shortening (FS) in young and old mice treated with miR-21 antagonist or not under Ang II-induced pressure overload. (F) The comparison of harvested hearts in mice of control, Ang II, miR-21 antagonist and Ang II+ miR-21 antagonist. \* $P < 0.05$  for difference from each group ( $N = 4-6$ ).
